# Supplementary material
Source: Springer Nature journal article supplement (https://www.springermedizin.de/resource/supplementary/12982_2012_108_MOESM3_ESM.pdf/9604210)

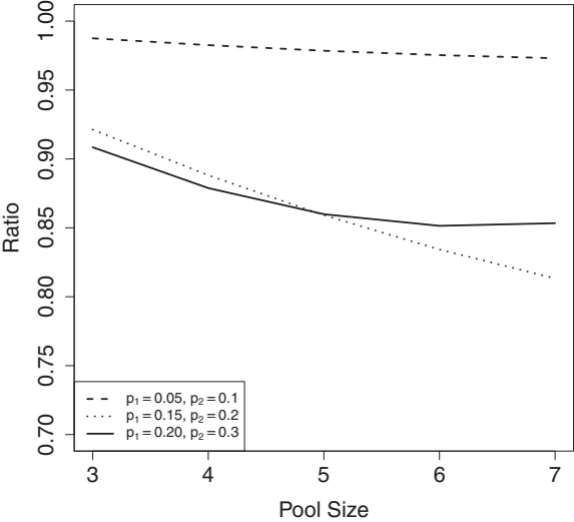

Supplement: MOESM3 [file 9604210]
